# Supplementary material for: Chlorine and temperature directed self-assembly of Mg–Ru2(ii,iii) carbonates and particle size dependent magnetic properties
Source: Royal Society of Chemistry journal article supplement (doi:10.1039/c5dt04463d), 2015-12-21
Supplement: c5dt04463d1.pdf [file c5dt04463d1.pdf]

## Electronic Supporting Information (ESI)

### Chlorine and Temperature Directed Self-assembly of Mg-Ru<sub>2</sub>(II,III)

#### Carbonates and Particle Size Dependent Magnetic Properties

Jian-Hui Yang,<sup>a</sup> Ru-Mei Cheng,<sup>a</sup> Yan-Yan Jia,<sup>a</sup> Jin Jin,<sup>a</sup> Bing-Bing Yang,<sup>a</sup> Zhi Cao<sup>\*b</sup> and Bin

Liu<sup>\*a</sup>

<sup>a</sup>Key Laboratory of Synthetic and Natural Functional Molecule Chemistry of Ministry of Education, Shaanxi Key Laboratory of Physico-Inorganic Chemistry, College of Chemistry & Materials Science, Northwest University, Xi'an 710069, P. R. China.

<sup>b</sup>Department of Chemistry, University of California, Berkeley, California 94720, United States

Table S1. Selected bond angles (°) of compounds 1–4

| 1                  |            | 2                 |            |
|--------------------|------------|-------------------|------------|
| Ru(1A)–Ru(1)–Cl(1) | 176.95(4)  | Ru(2)–Ru(1)–Cl(1) | 180.00(2)  |
| Ru(1A)–Ru(1)–O(1)  | 89.44(9)   | Ru(2)–Ru(1)–O(1)  | 89.35(6)   |
| Ru(1A)–Ru(1)–O(4)  | 89.63(10)  | Ru(1)–Ru(2)–O(3)  | 90.54(6)   |
| Ru(1A)–Ru(1)–O(2A) | 90.04(10)  | Ru(1)–Ru(2)–O(4)  | 180.00(2)  |
| Ru(1A)–Ru(1)–O(5A) | 89.86(10)  | Cl(1)–Ru(1)–O(1)  | 90.65(6)   |
| O(1)–Ru(1)–O(2A)   | 179.46(13) | O(1)–Ru(1)–O(1A)  | 178.70(9)  |
| O(1)–Ru(1)–O(5A)   | 90.54(14)  | O(1)–Ru(1)–O(1B)  | 91.08(7)   |
| O(2A)–Ru(1)–O(4)   | 90.87(15)  | O(1)–Ru(1)–O(1C)  | 88.91(7)   |
| O(4)–Ru(1)–O(5A)   | 179.45(13) | O(3)–Ru(2)–O(4)   | 89.46(6)   |
| O(2A)–Ru(1)–O(5A)  | 89.32(15)  | O(3)–Ru(2)–O(3A)  | 178.92(9)  |
| Cl(1)–Ru(1)–O(1)   | 88.74(10)  | O(3)–Ru(2)–O(3B)  | 89.94(8)   |
| Cl(1)–Ru(1)–O(4)   | 87.90(10)  | O(3)–Ru(2)–O(3C)  | 90.05(8)   |
| Cl(1)–Ru(1)–O(2A)  | 91.79(10)  | Mg(1)–O(2)–C(1)   | 132.8(3)   |
| Cl(1)–Ru(1)–O(5A)  | 92.61(10)  | Ru(1)–O(1)–C(1)   | 119.35(18) |
| O(7)–Mg(1)–O(8)    | 91.35(19)  | Ru(2)–O(3)–C(1)   | 120.77(19) |
| O(7)–Mg(1)–O(9)    | 92.25(18)  | O(2)–Mg(1)–O(5)   | 95.60(9)   |
| O(7)–Mg(1)–O(10)   | 88.39(18)  | O(2)–Mg(1)–O(6)   | 91.13(8)   |
| O(7)–Mg(1)–O(11)   | 174.1(2)   | O(2)–Mg(1)–O(2D)  | 84.48(11)  |
| O(7)–Mg(1)–O(12)   | 92.24(19)  | O(2)–Mg(1)–O(5D)  | 176.34(7)  |
| O(8)–Mg(1)–O(9)    | 90.67(18)  | O(2)–Mg(1)–O(6D)  | 92.87(8)   |
| O(8)–Mg(1)–O(10)   | 177.98(18) | O(5)–Mg(1)–O(6)   | 90.79(9)   |

|                    |            |                    |            |
|--------------------|------------|--------------------|------------|
| O(8)–Mg(1)–O(11)   | 94.57(19)  | O(5)–Mg(1)–O(5D)   | 84.56(9)   |
| O(8)–Mg(1)–O(12)   | 88.47(18)  | O(5)–Mg(1)–O(6D)   | 85.22(9)   |
| O(9)–Mg(1)–O(10)   | 87.34(18)  | O(6)–Mg(1)–O(6D)   | 174.61(11) |
| O(9)–Mg(1)–O(11)   | 87.43(19)  |                    |            |
| O(9)–Mg(1)–O(12)   | 175.4(2)   |                    |            |
| O(10)–Mg(1)–O(11)  | 85.69(19)  |                    |            |
| O(10)–Mg(1)–O(12)  | 93.55(18)  |                    |            |
| O(11)–Mg(1)–O(12)  | 88.18(18)  |                    |            |
| <b>3</b>           |            | <b>4</b>           |            |
| Ru(2)–Ru(1)–O(1)   | 89.44(15)  | Ru(1A)–Ru(1)–O(2)  | 90.4(3)    |
| Ru(2)–Ru(1)–O(4)   | 90.15(15)  | Ru(1A)–Ru(1)–O(5)  | 89.7(2)    |
| Ru(2)–Ru(1)–O(7)   | 90.64(15)  | Ru(1A)–Ru(1)–O(3B) | 175.0(2)   |
| Ru(2)–Ru(1)–O(10)  | 89.23(15)  | Ru(1A)–Ru(1)–O(1A) | 89.3(2)    |
| Ru(2)–Ru(1)–O(6A)  | 176.04(15) | Ru(1A)–Ru(1)–O(4A) | 89.9(2)    |
| Ru(1)–Ru(2)–O(2)   | 90.27(15)  | O(2)–Ru(1)–O(5)    | 89.4(4)    |
| Ru(1)–Ru(2)–O(5)   | 89.70(15)  | O(2)–Ru(1)–O(3B)   | 84.7(3)    |
| Ru(1)–Ru(2)–O(8)   | 88.82(15)  | O(2)–Ru(1)–O(4A)   | 90.6(4)    |
| Ru(1)–Ru(2)–O(11)  | 90.56(15)  | O(3B)–Ru(1)–O(5)   | 91.5(4)    |
| Ru(1)–Ru(2)–O(12B) | 174.63(15) | O(1A)–Ru(1)–O(5)   | 90.9(4)    |
| O(1)–Ru(1)–O(4)    | 88.5(2)    | O(4A)–Ru(1)–O(5)   | 179.6(3)   |
| O(1)–Ru(1)–O(7)    | 178.5(2)   | O(1A)–Ru(1)–O(3B)  | 95.5(3)    |
| O(1)–Ru(1)–O(10)   | 91.2(2)    | O(3A)–Ru(1)–O(4B)  | 88.9(4)    |
| O(1)–Ru(1)–O(6A)   | 89.6(2)    | O(1A)–Ru(1)–O(4B)  | 89.2(4)    |
| O(4)–Ru(1)–O(7)    | 93.0(2)    | Ru(1A)–O(1)–C(1)   | 120.6(8)   |
| O(4)–Ru(1)–O(10)   | 179.32(19) | Ru(1)–O(2)–C(1)    | 118.8(8)   |
| O(4)–Ru(1)–O(6A)   | 86.0(2)    | Ru(1C)–O(3)–C(1)   | 136.5(9)   |
| O(7)–Ru(1)–O(10)   | 87.3(2)    | Ru(1A)–O(4)–C(2)   | 120.2(9)   |
| O(6A)–Ru(1)–O(7)   | 90.4(2)    | Ru(1)–O(5)–C(2)    | 120.3(8)   |
| O(6A)–Ru(1)–O(10)  | 94.6(2)    | Mg(1)–O(6)–C(2)    | 130.8(8)   |
| O(2)–Ru(2)–O(5)    | 90.51(19)  | O(6)–Mg(1)–O(7)    | 87.8(4)    |
| O(2)–Ru(2)–O(8)    | 177.8(2)   | O(6)–Mg(1)–O(8)    | 88.9(4)    |
| O(2)–Ru(2)–O(11)   | 88.79(18)  | O(6)–Mg(1)–O(6D)   | 92.4(4)    |
| O(2)–Ru(2)–O(12B)  | 86.4(2)    | O(6)–Mg(1)–O(7D)   | 89.7(4)    |
| O(5)–Ru(2)–O(8)    | 91.5(2)    | O(6)–Mg(1)–O(8D)   | 176.2(4)   |
| O(5)–Ru(2)–O(11)   | 179.25(18) | O(7)–Mg(1)–O(8)    | 94.0(5)    |
| O(5)–Ru(2)–O(12B)  | 94.5(2)    | O(7)–Mg(1)–O(7D)   | 176.4(5)   |
| O(8)–Ru(2)–O(11)   | 89.2(2)    | O(7)–Mg(1)–O(8D)   | 88.6(5)    |
| O(8)–Ru(2)–O(12B)  | 94.4(2)    | O(8)–Mg(1)–O(8D)   | 90.1(5)    |

|                    |          |
|--------------------|----------|
| O(11)–Ru(2)–O(12B) | 85.2(2)  |
| Ru(1)–O(1)–C(1)    | 119.2(4) |
| Ru(1)–O(4)–C(2)    | 120.2(5) |
| Ru(1)–O(7)–C(3)    | 119.6(4) |
| Ru(1)–O(10)–C(4)   | 120.6(5) |
| Ru(2)–O(2)–C(1)    | 119.4(4) |
| Ru(2)–O(5)–C(2)    | 121.0(5) |
| Ru(2)–O(8)–C(3)    | 121.9(4) |
| Ru(2)–O(11)–C(4)   | 119.9(5) |
| Ru(1C)–O(6)–C(2)   | 134.2(6) |
| Ru(2D)–O(12)–C(4)  | 132.7(5) |
| Mg(1)–O(3)–C(1)    | 124.2(5) |
| O(3)–Mg(1)–O(13)   | 87.8(2)  |
| O(3)–Mg(1)–O(14)   | 94.8(2)  |
| O(3)–Mg(1)–O(15)   | 88.0(2)  |
| O(3)–Mg(1)–O(16)   | 87.3(2)  |
| O(3)–Mg(1)–O(17)   | 174.4(2) |
| O(13)–Mg(1)–O(14)  | 90.3(2)  |
| O(13)–Mg(1)–O(15)  | 175.6(2) |
| O(13)–Mg(1)–O(16)  | 92.4(2)  |
| O(13)–Mg(1)–O(17)  | 88.2(2)  |
| O(14)–Mg(1)–O(15)  | 88.5(2)  |
| O(14)–Mg(1)–O(16)  | 176.6(2) |
| O(14)–Mg(1)–O(17)  | 89.2(2)  |
| O(15)–Mg(1)–O(16)  | 89.0(2)  |
| O(15)–Mg(1)–O(17)  | 96.1(2)  |
| O(16)–Mg(1)–O(17)  | 88.9(2)  |

---

Symmetry codes: **1.** A, 2 - x, -y, 1 - z; **2.** A, 2 - x, 1 - y, z; B, 2 - x, y, z; C, x, 1 - y, z; D, 3/2 - x, 3/2 - y, z; **3.** A, 1 - x, 1/2 + y, 2 - z; B, 2 - x, -1/2 + y, 2 - z; C, 1 - x, -1/2 + y, 2 - z; D, 2 - x, 1/2 + y, 2 - z; **4.** A, 1 - x, -y, 1 - z; B, 1 - x, 1/2 + y, 3/2 - z; C, 1 - x, -1/2 + y, 3/2 - z; D, 3/2 - x, 1/2 - y, z.

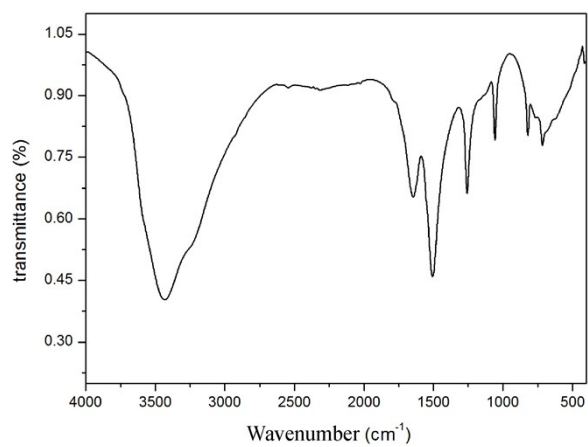

**Fig. S1** IR spectra of compound 1.

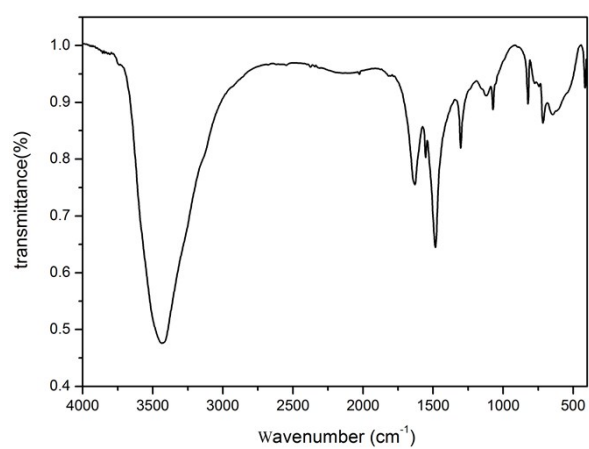

**Fig S2.** IR spectra of compound 2.

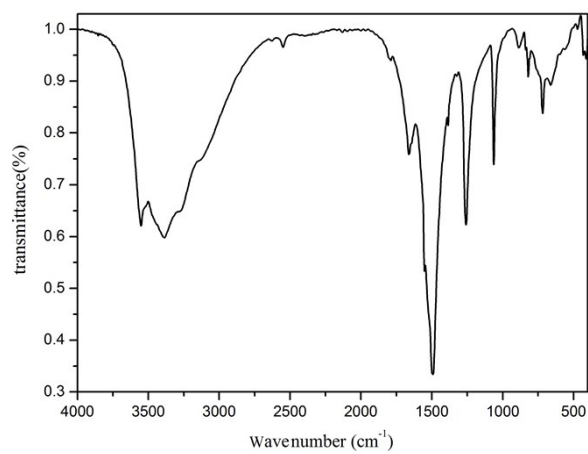

**Fig S3.** IR spectra of compound 3.

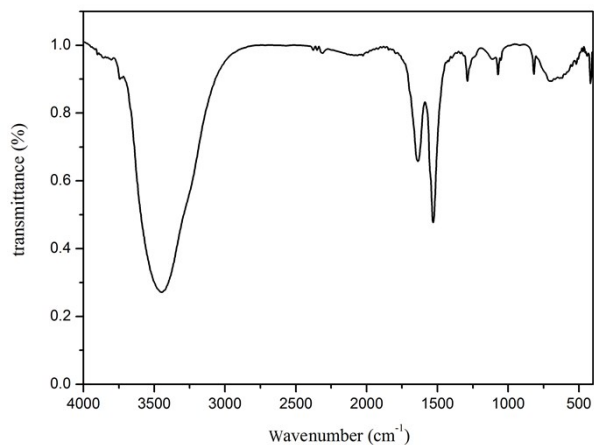

**Fig S4.** IR spectra of compound **4**.

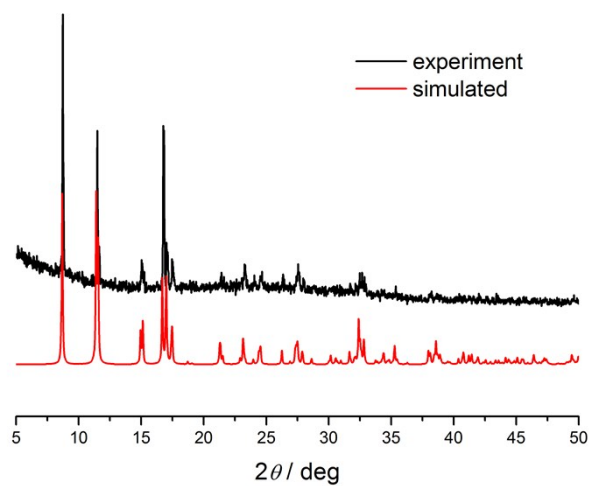

**Fig. S5** Comparison of XRPD patterns of the simulated pattern from the single-crystal structure determination and as-synthesized product of **1**.

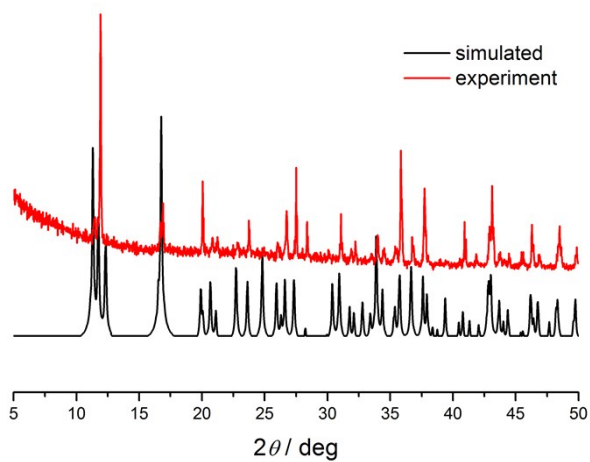

**Fig. S6** Comparison of XRPD patterns of the simulated pattern from the single-crystal structure determination and as-synthesized product of **2**.

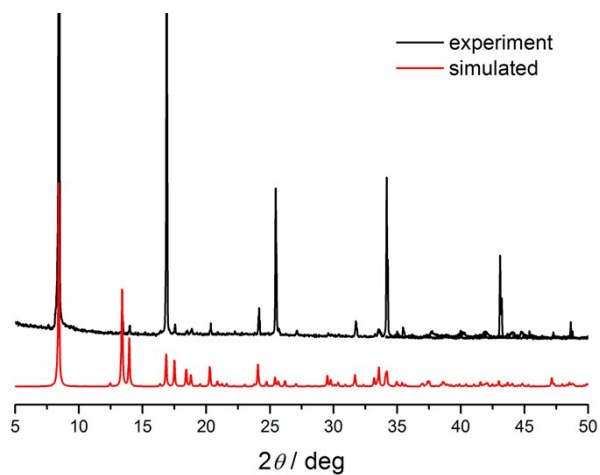

**Fig. S7** Comparison of XRPD patterns of the simulated pattern from the single-crystal structure determination and as-synthesized product of **3**

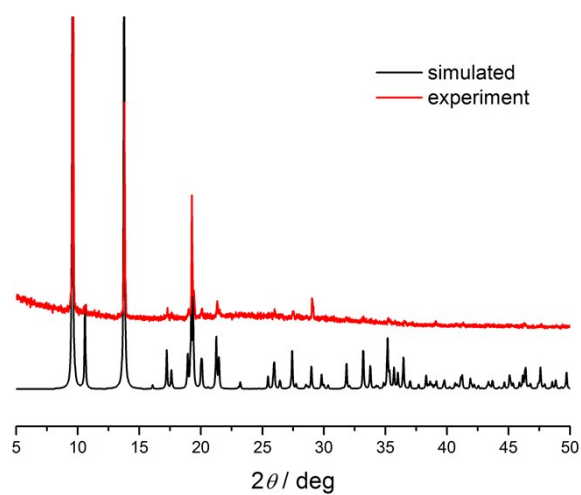

**Fig. S8** Comparison of XRPD patterns of the simulated pattern from the single-crystal structure determination and as-synthesized product of **4**.

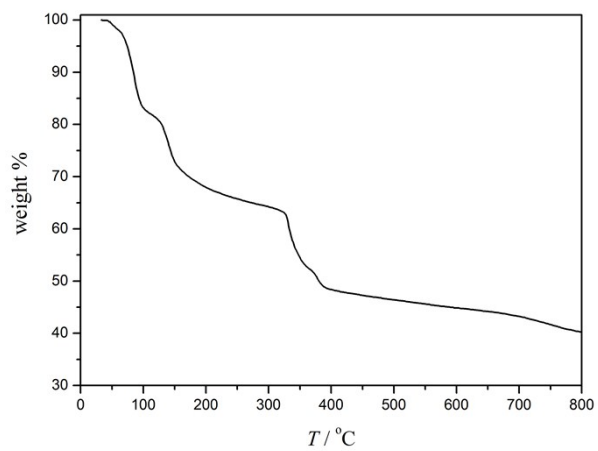

**Fig. S9** TG curve of compound **1**

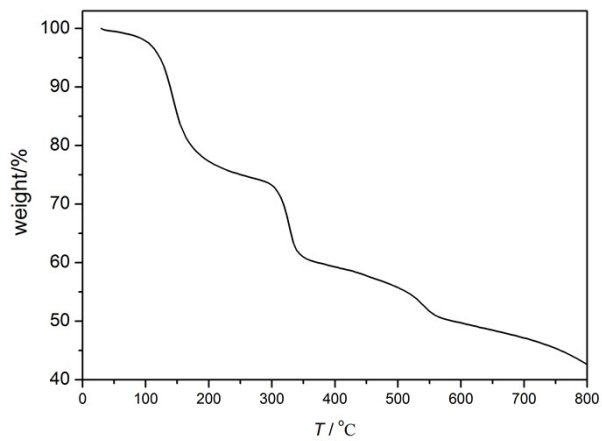

**Fig. S10** TG curve of compound 2.

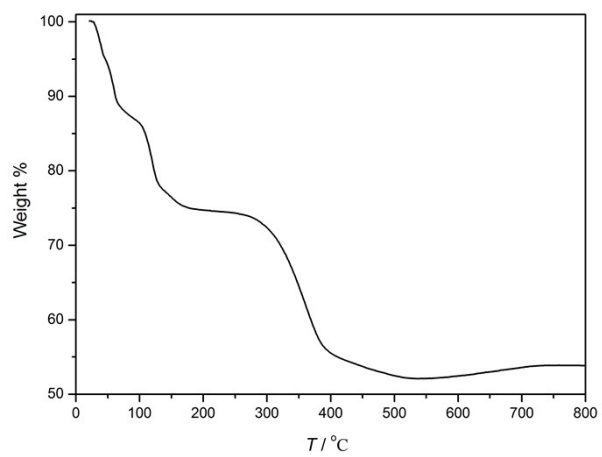

**Fig. S11** TG curve of compound 3

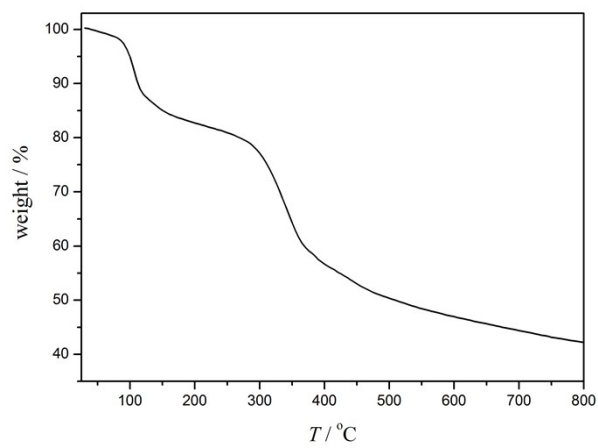

**Fig. S12** TG curve of compound 4

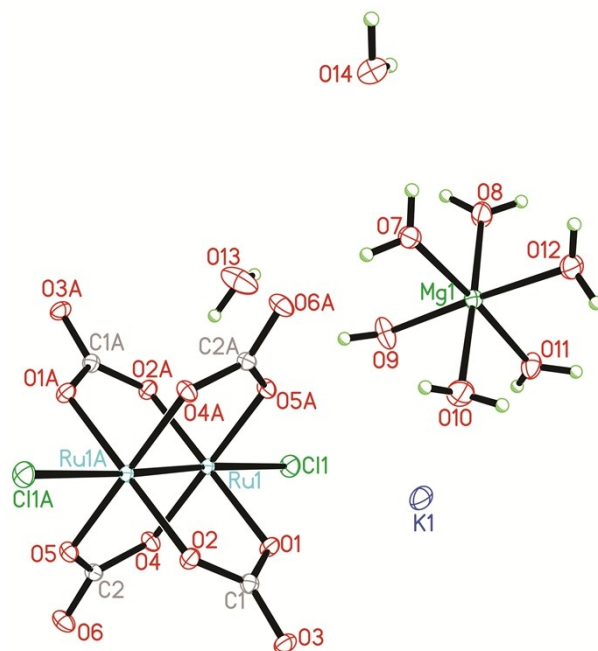

**Fig. S13** ORTEP representation (30% thermal probability ellipsoids) of the crystal structure of **1**

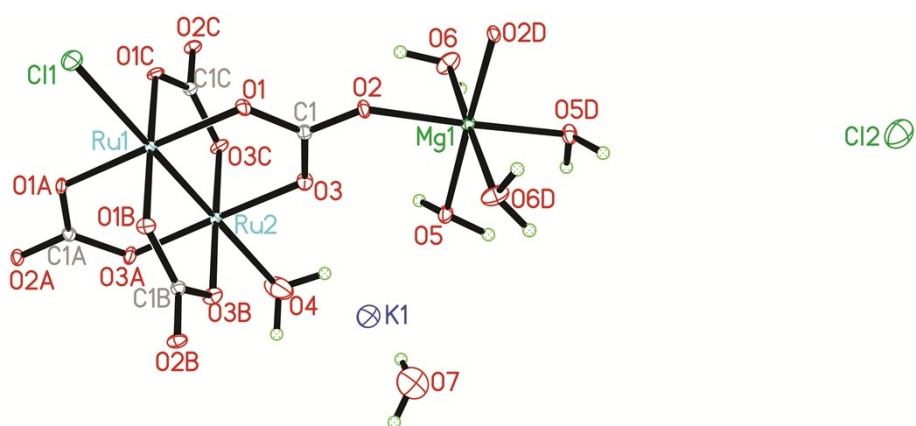

**Fig. S14** ORTEP representation (30% thermal probability ellipsoids) of the crystal structure of **2**

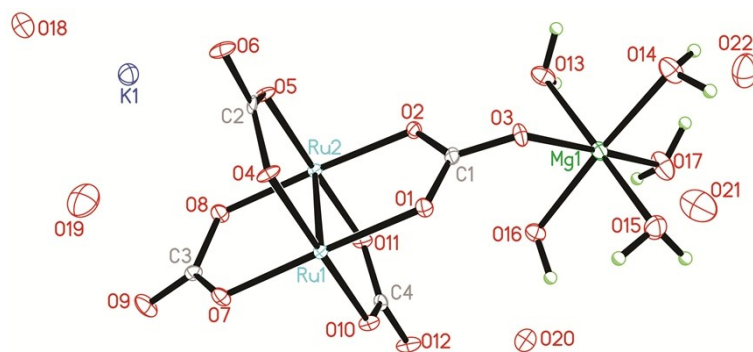

**Fig. S15** ORTEP representation (30% thermal probability ellipsoids) of the crystal structure of **3**



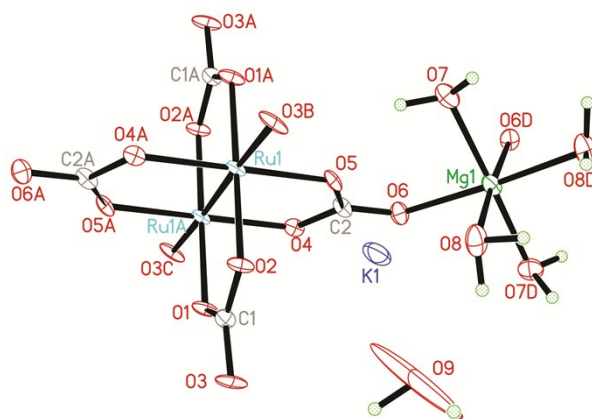

**Fig. S16** ORTEP representation (30% thermal probability ellipsoids) of the crystal structure of **4**.

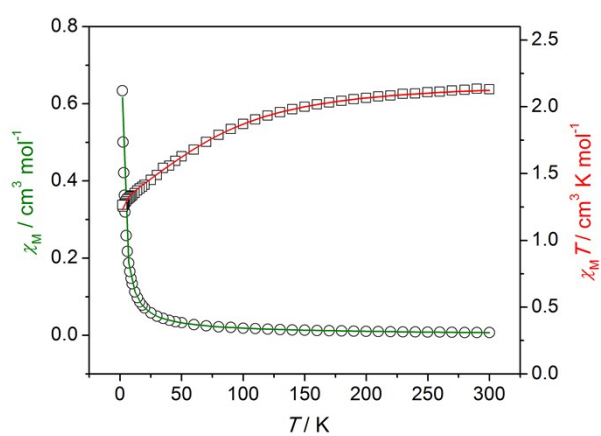

**Fig S17.**  $\chi_M$  and  $\chi_M T$  vs  $T$  plots for **2**.

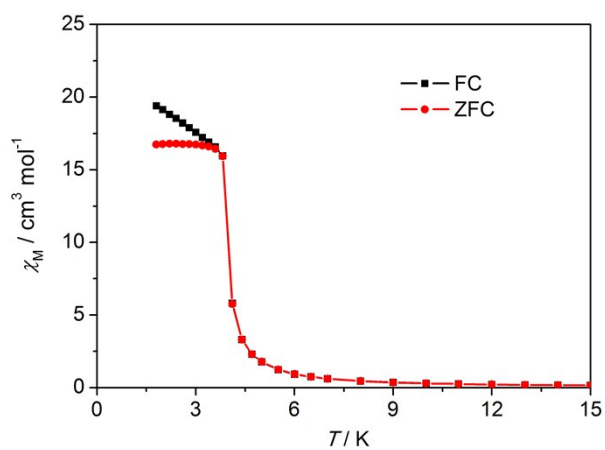

**Fig S18.** FC and ZFC vs  $T$  plots for **3**.

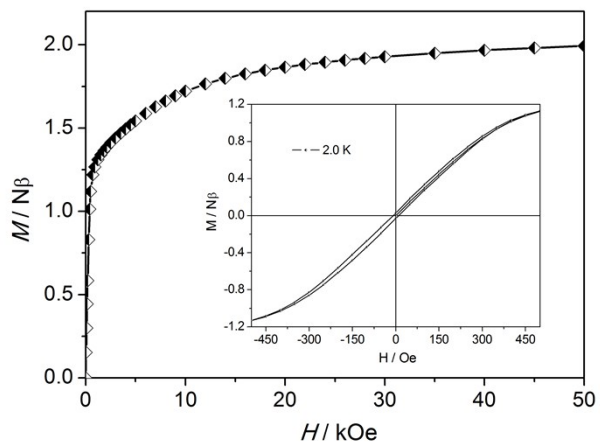

**Fig S19.**  $M$  and  $\chi_M T$  vs  $H$  plots for **3**.

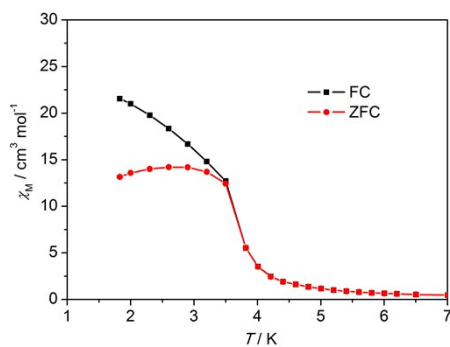

**Fig S20.** FC and ZFC vs  $T$  plots for **4** (large crystals)

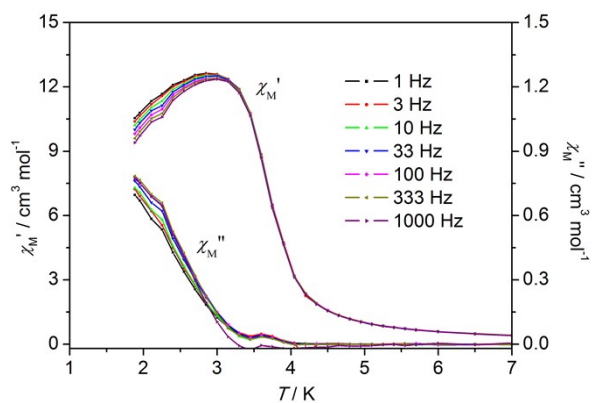

**Fig S21.** In-phase ( $\chi_M'$ ) and out-of-phase ( $\chi_M''$ ) components for sample **4-1** with increasing frequencies

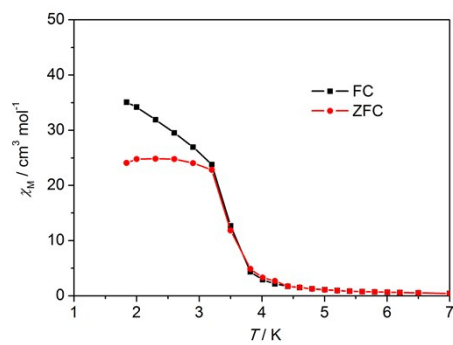

**Fig S22.** FC and ZFC vs  $T$  plots for sample 4-1.

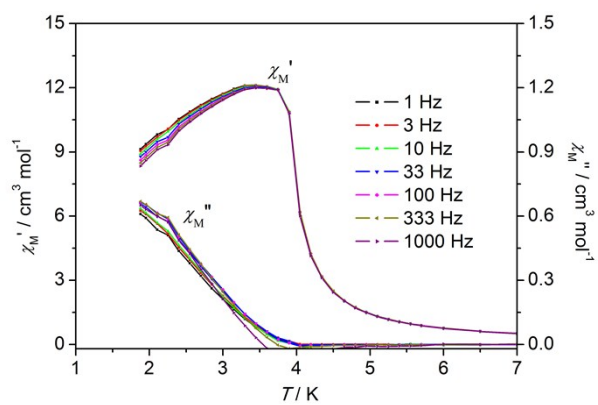

**Fig S23.** In-phase ( $\chi_M'$ ) and out-of-phase ( $\chi_M''$ ) components for sample 4-2 with increasing frequencies

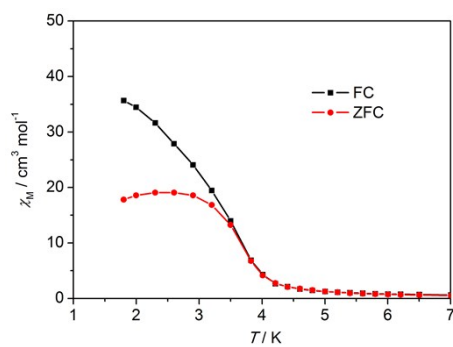

**Fig S24.** FC and ZFC vs  $T$  plots for sample 4-2

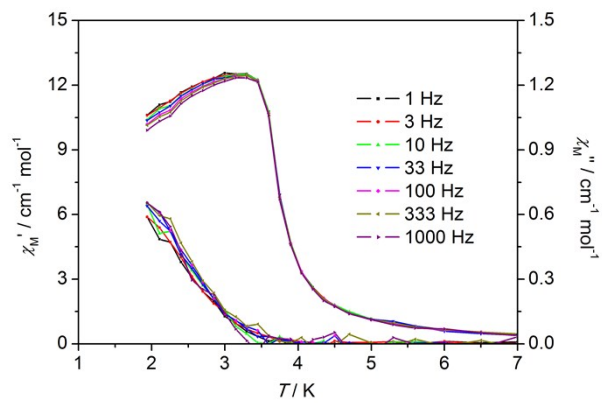

**Fig S25.** In-phase ( $\chi_M'$ ) and out-of-phase ( $\chi_M''$ ) components for sample **4-3** with increasing frequencies

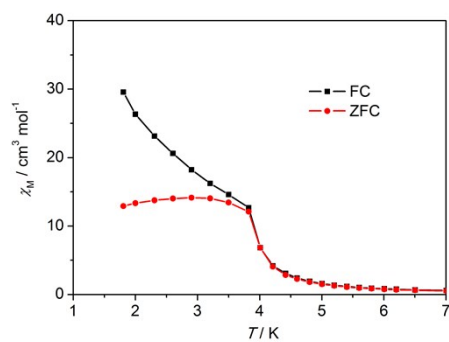

**Fig S26.** FC and ZFC vs  $T$  plots for sample **4-3**
